# Supplementary material
Source: PubMed Central journal article supplement (PMC5803347)
Supplement: NIHMS904667-supplement-1.pdf [file NIHMS904667-supplement-1.pdf]

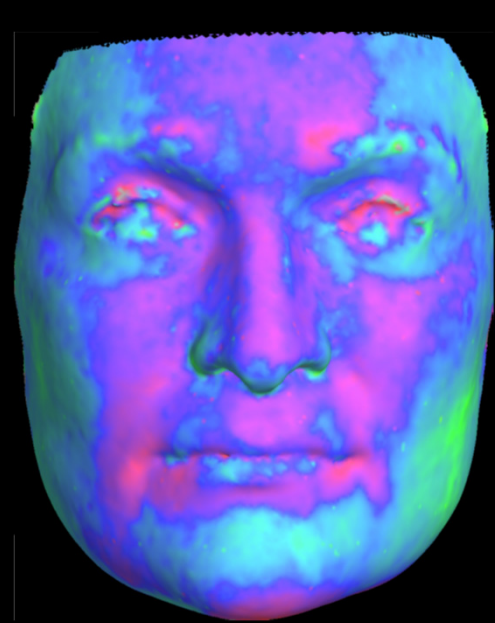

RMS=0.58

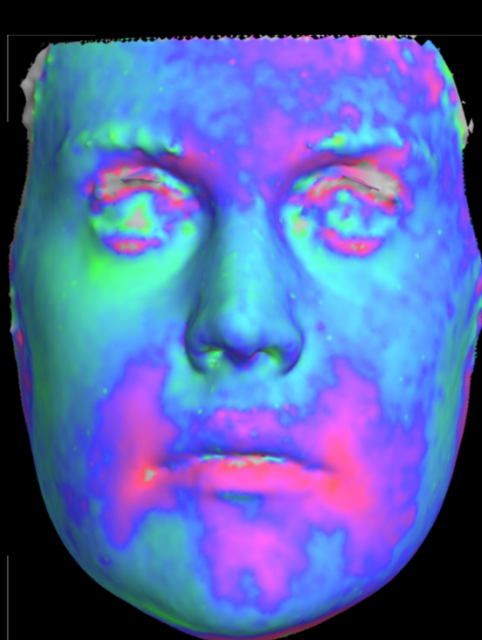

RMS=0.46

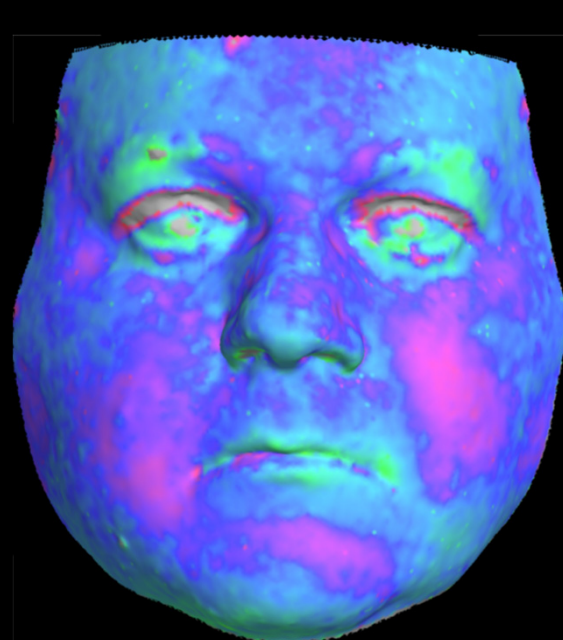

RMS=0.33

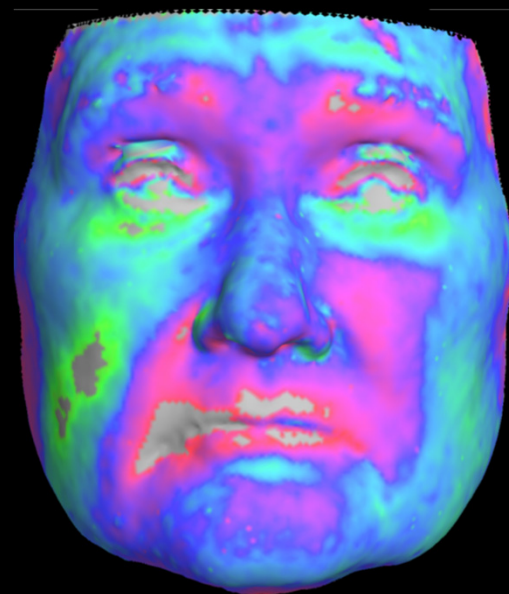

RMS=0.48

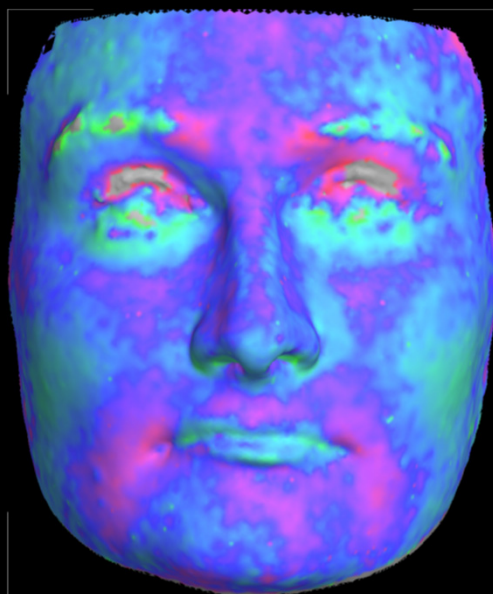

RMS=0.36

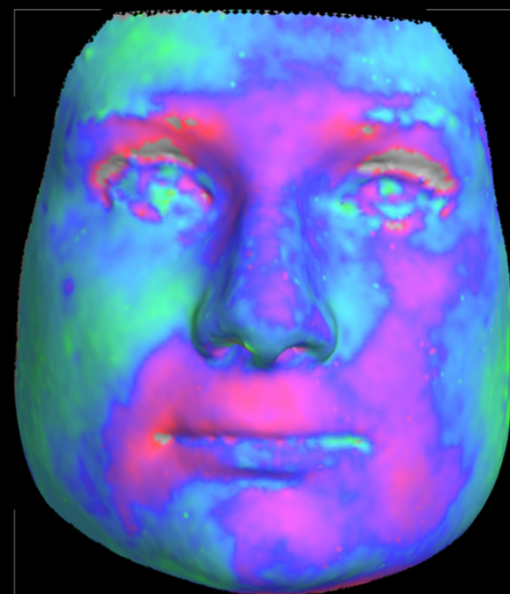

RMS=0.43

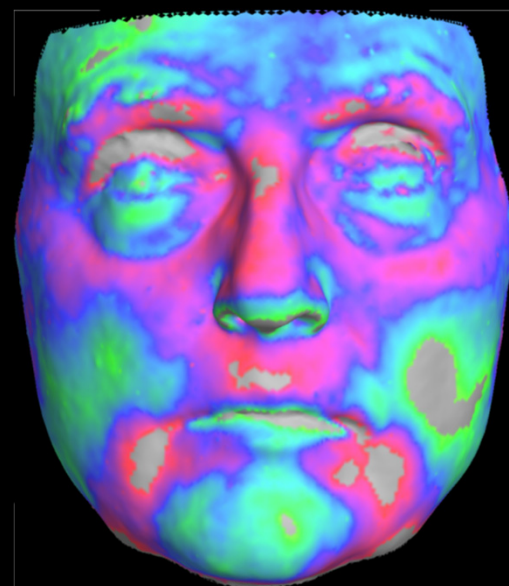

RMS=0.59

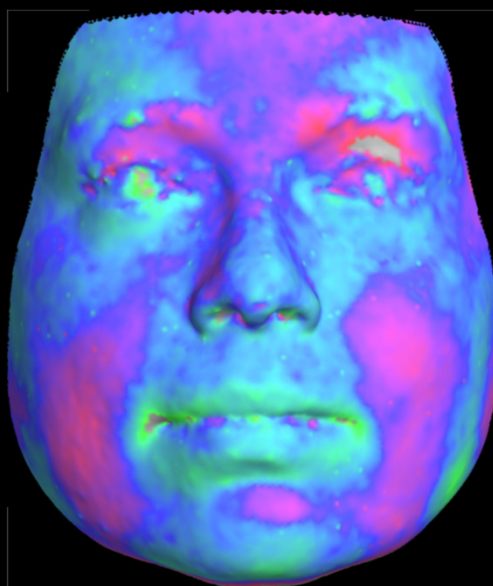

RMS=0.36

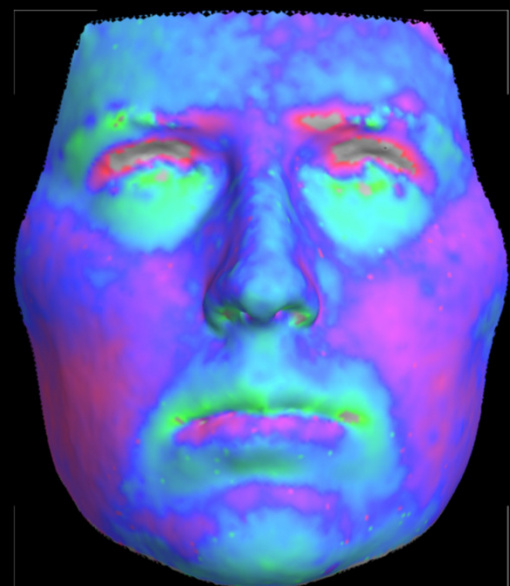

RMS=0.36

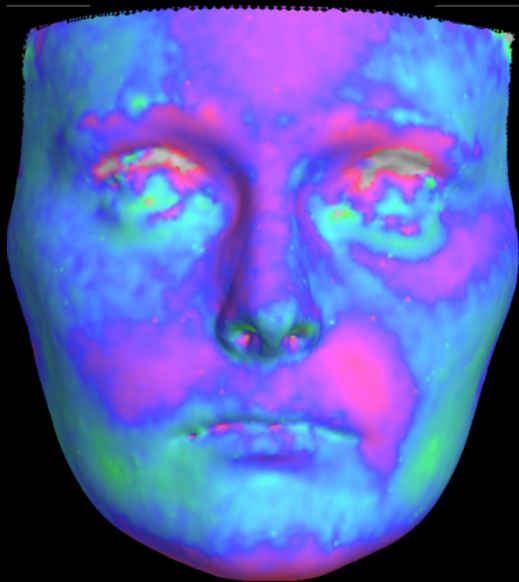

RMS=0.34

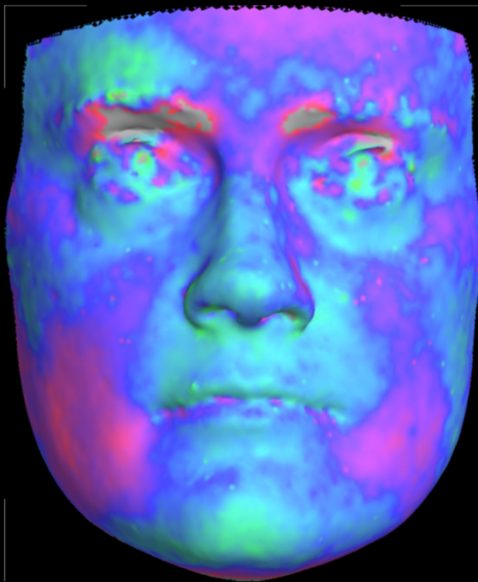

RMS=0.48

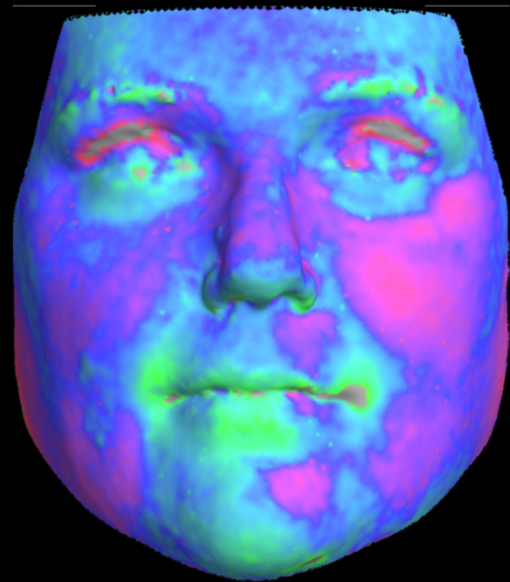

RMS=0.33

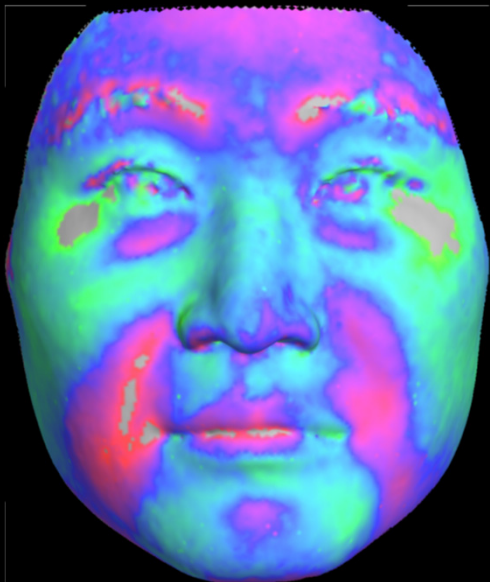

RMS=0.45

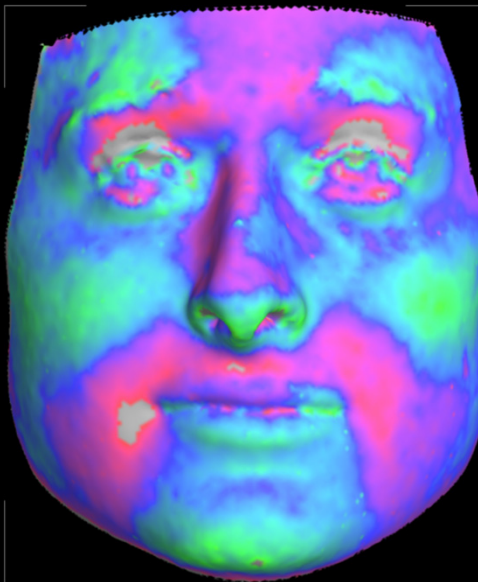

RMS=0.47

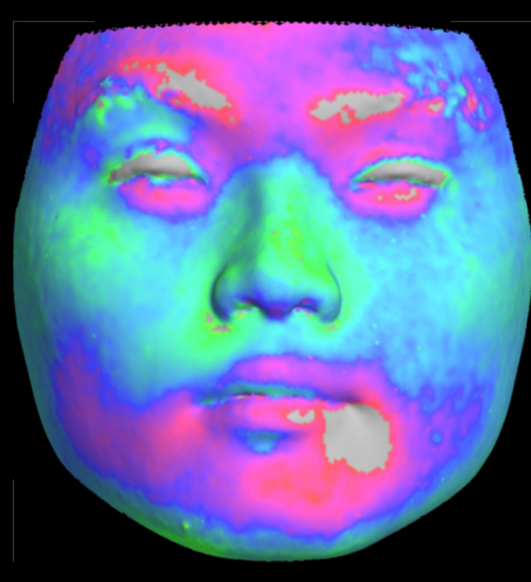

RMS=0.51

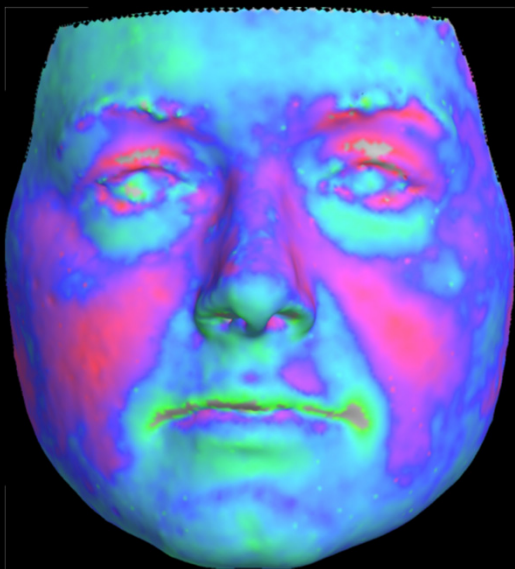

RMS=0.35

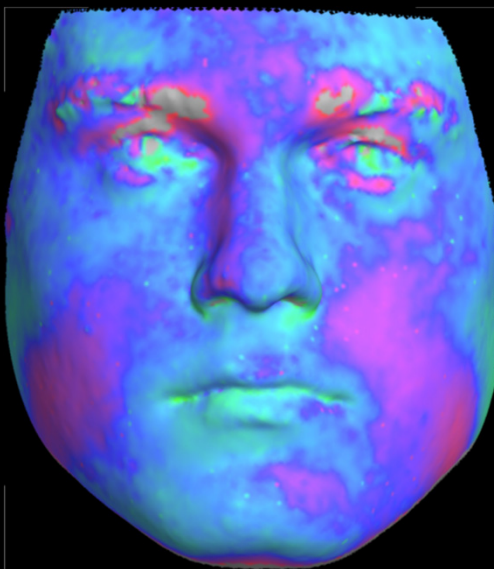

RMS=0.45

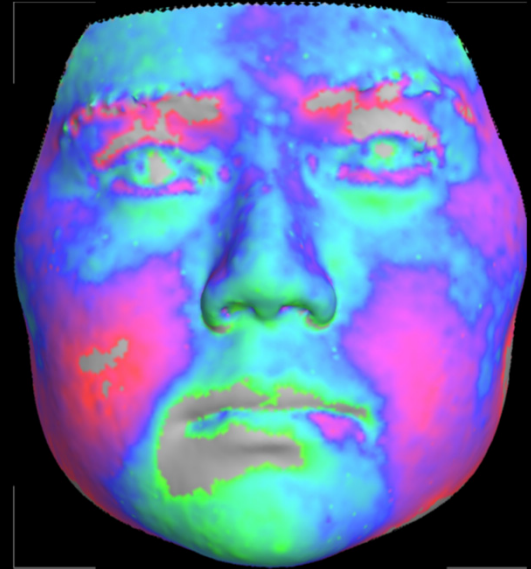

RMS=0.54

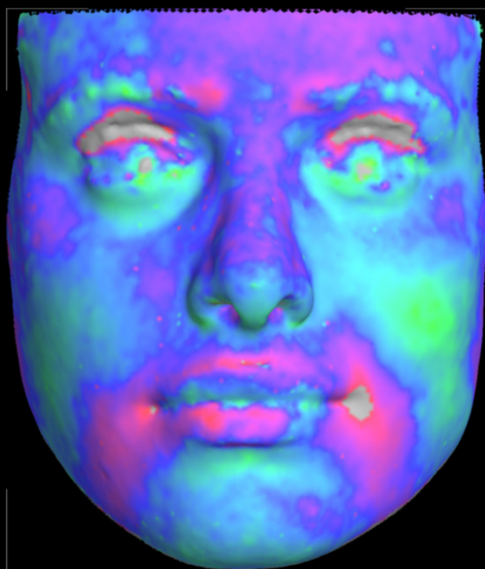

RMS=0.42

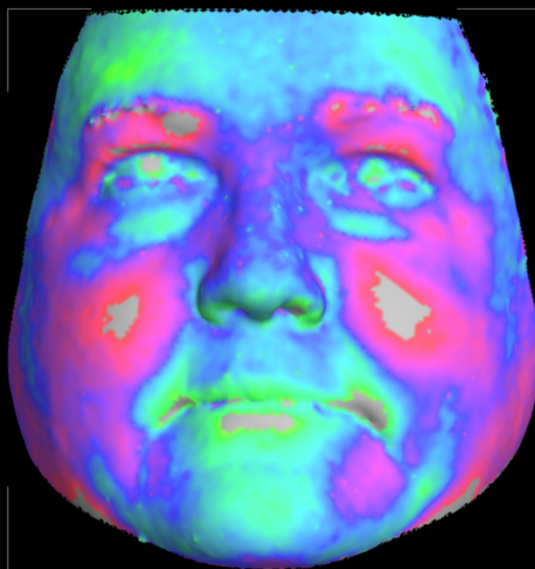

RMS=0.47

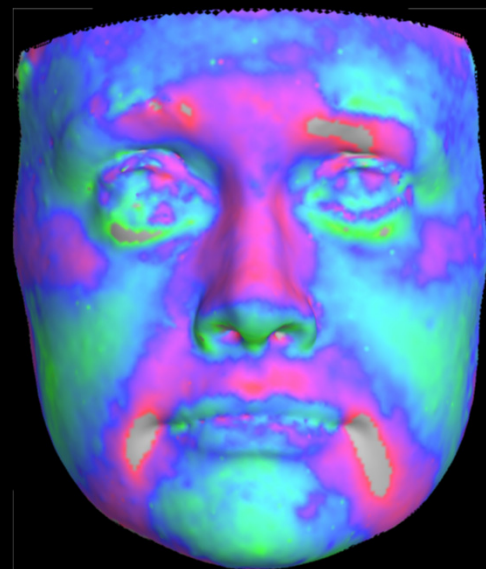

RMS=0.42

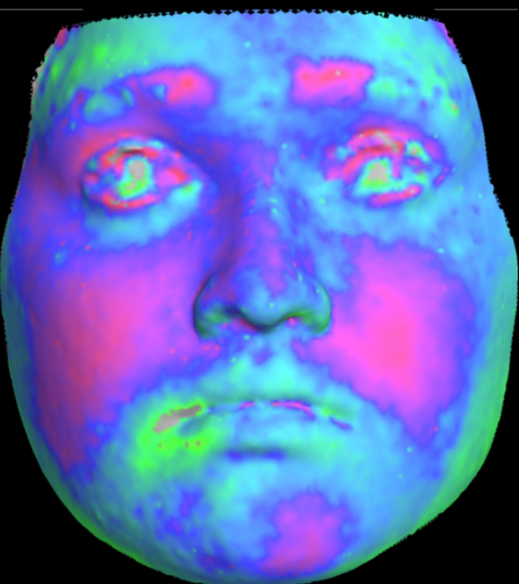

RMS=0.38

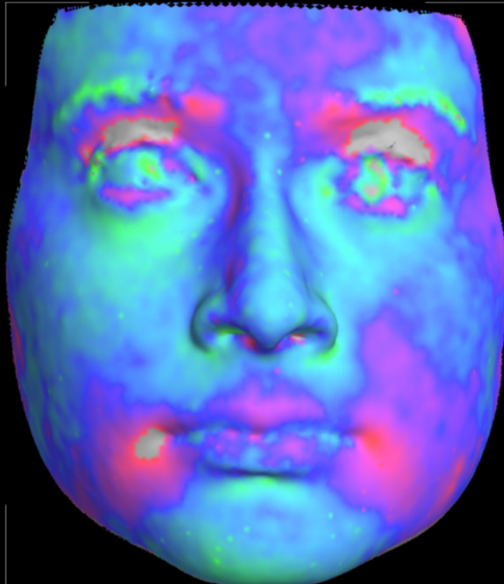

RMS=0.40

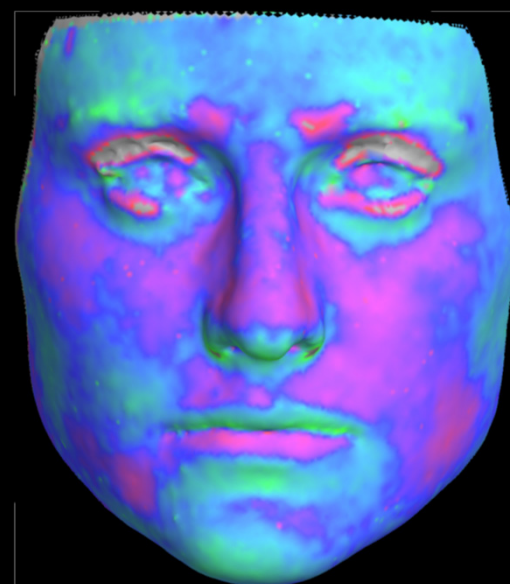

RMS=0.42

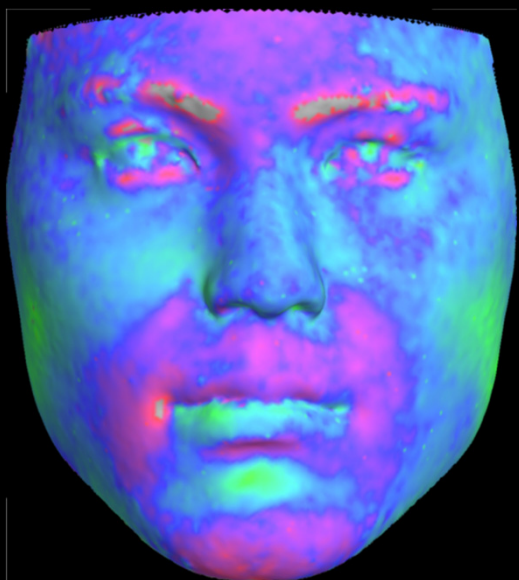

RMS=0.34

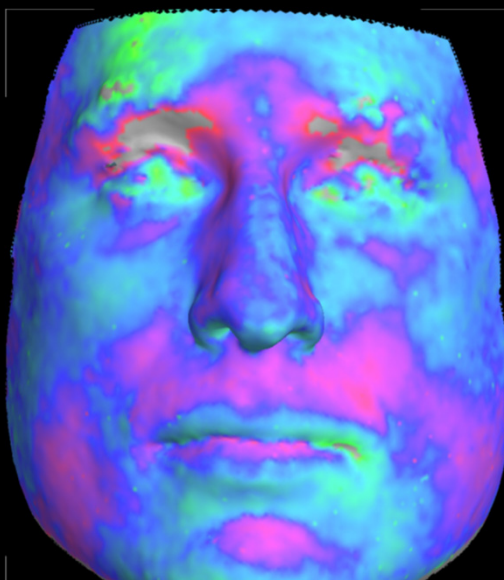

RMS=0.48

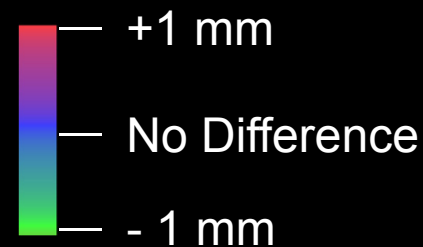

**Figure S1.** Heat maps comparing 3dMD and Vectra H1 surfaces with a +/- 1 mm threshold.
