# Supplementary material
Source: PubMed Central journal article supplement (PMC5803347)

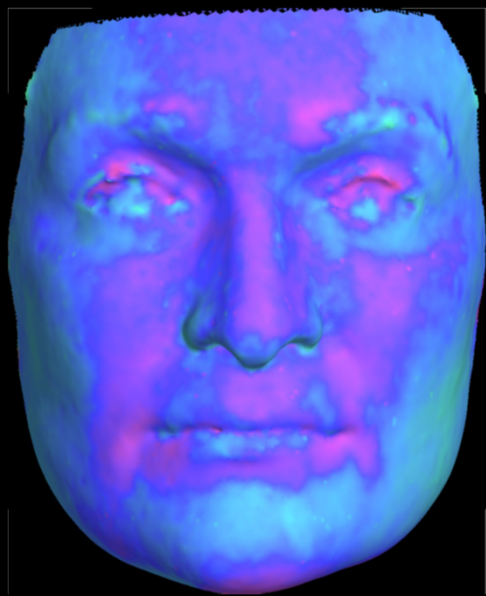

RMS=0.58

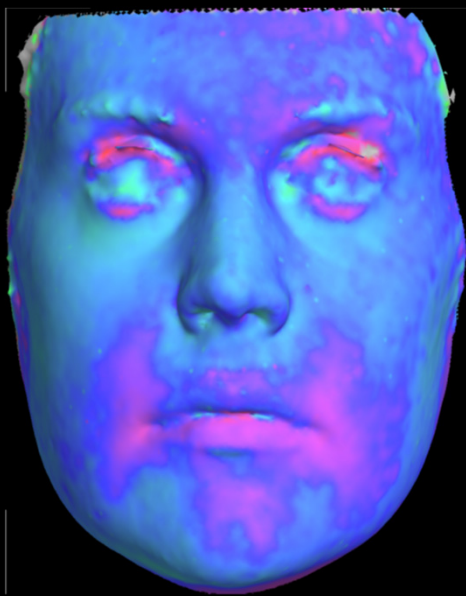

RMS=0.46

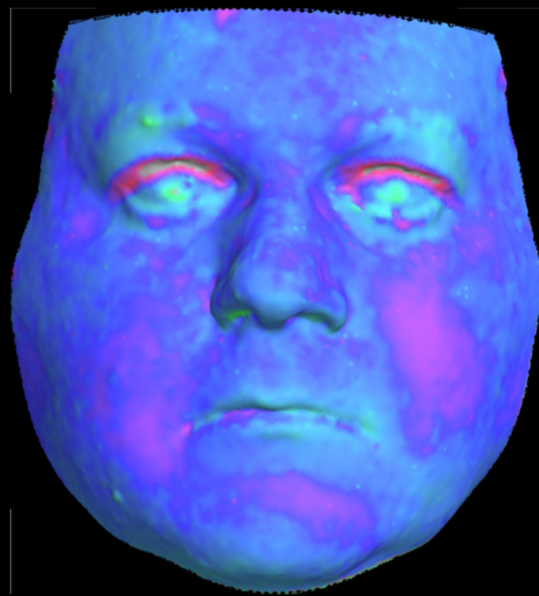

RMS=0.33

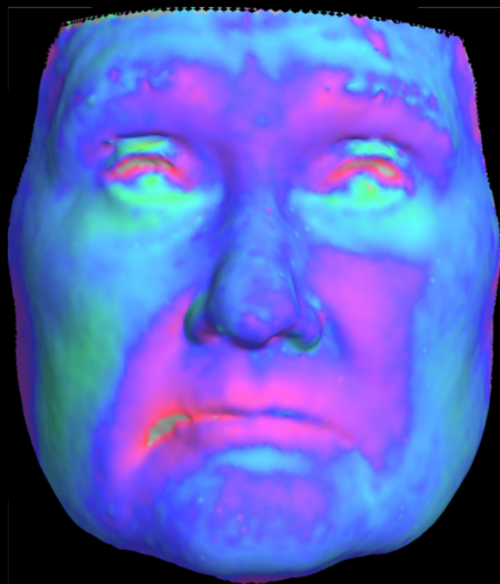

RMS=0.48

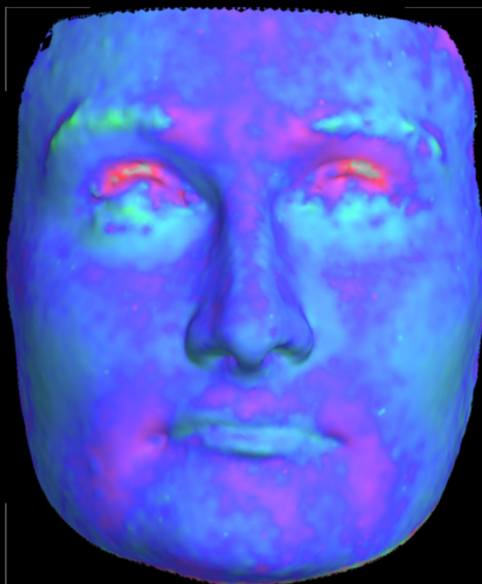

RMS=0.36

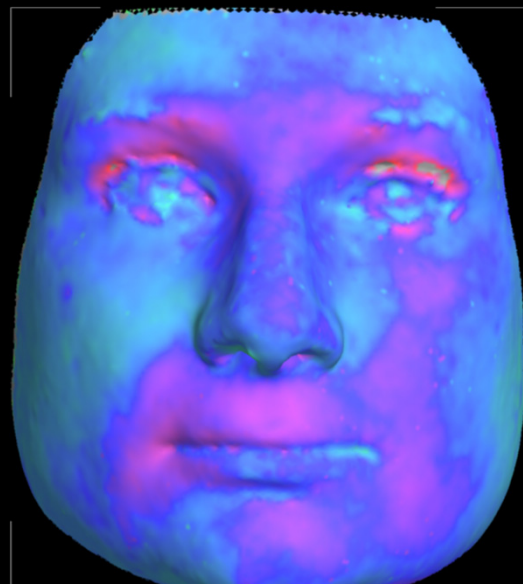

RMS=0.43

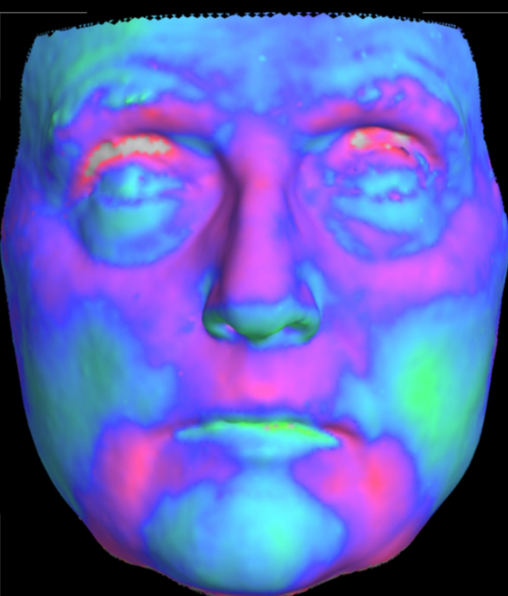

RMS=0.59

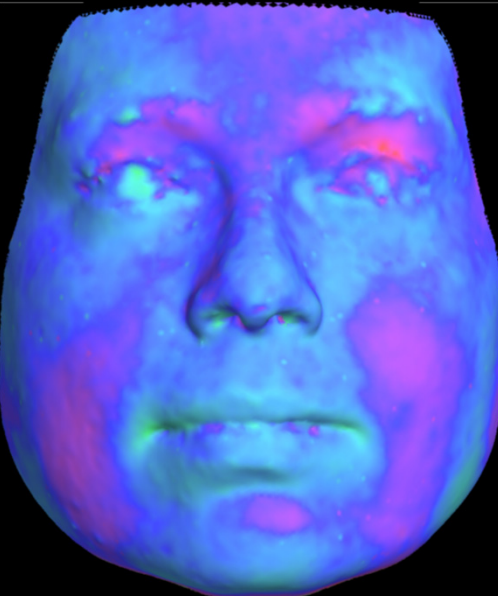

RMS=0.36

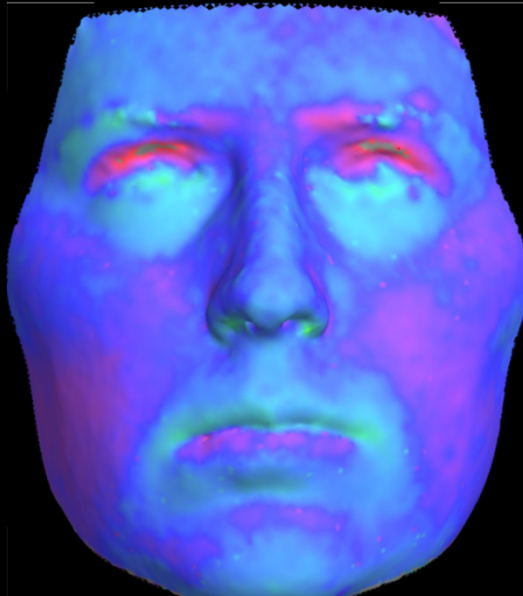

RMS=0.36

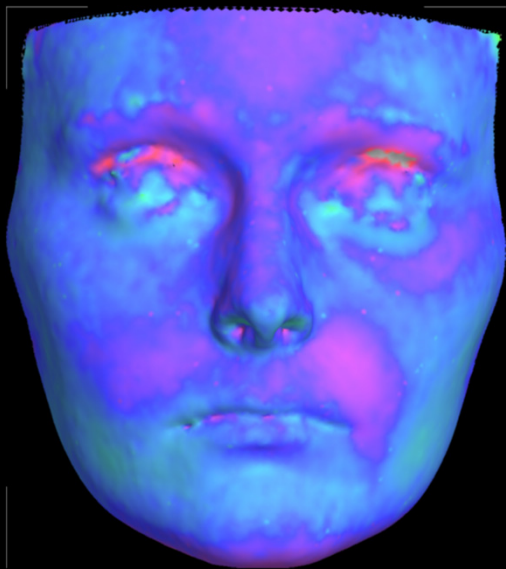

RMS=0.34

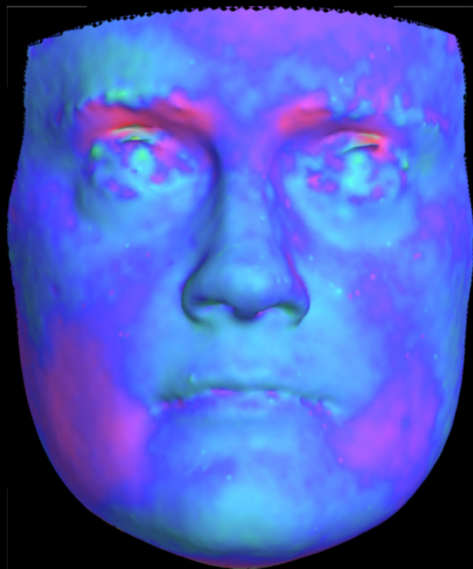

RMS=0.48

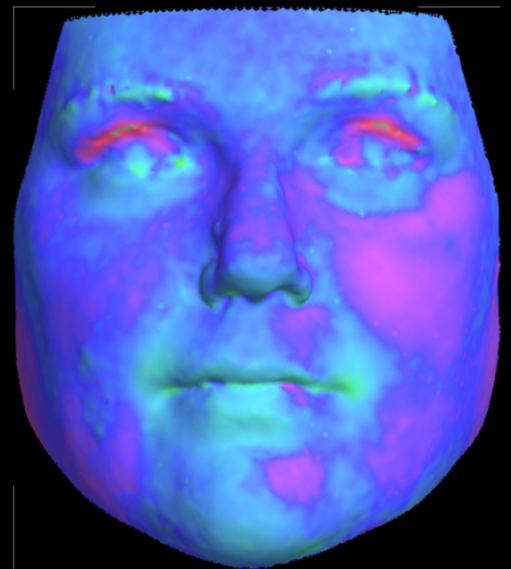

RMS=0.33

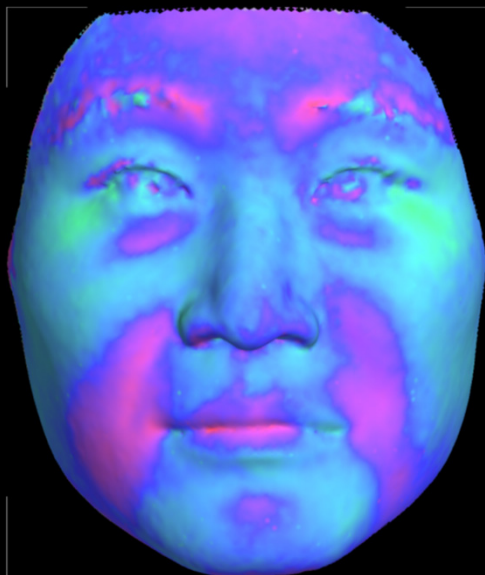

RMS=0.45

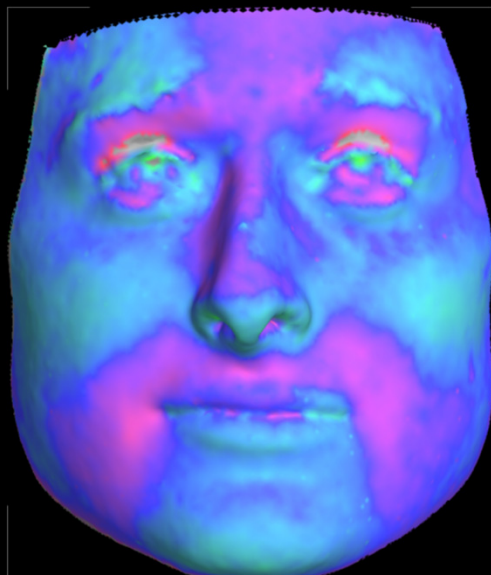

RMS=0.47

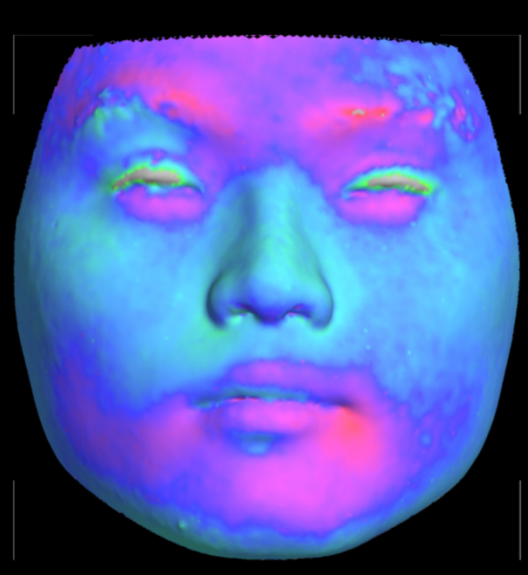

RMS=0.51

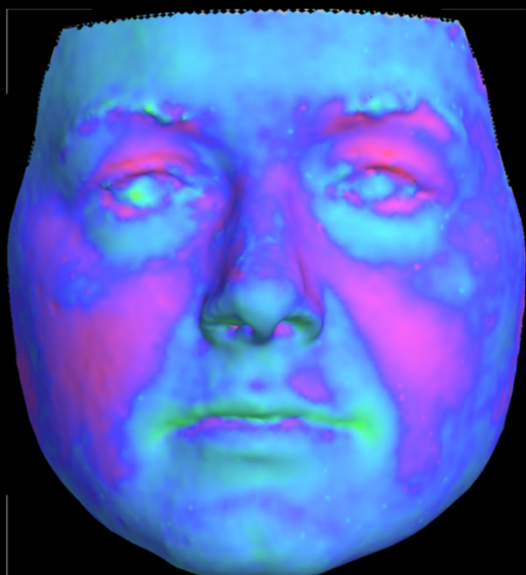

RMS=0.35

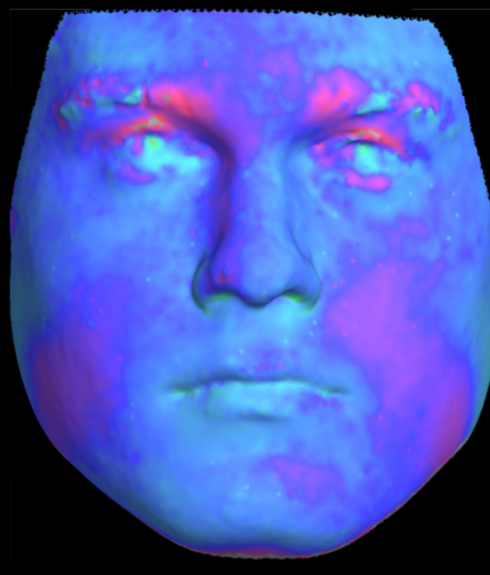

RMS=0.45

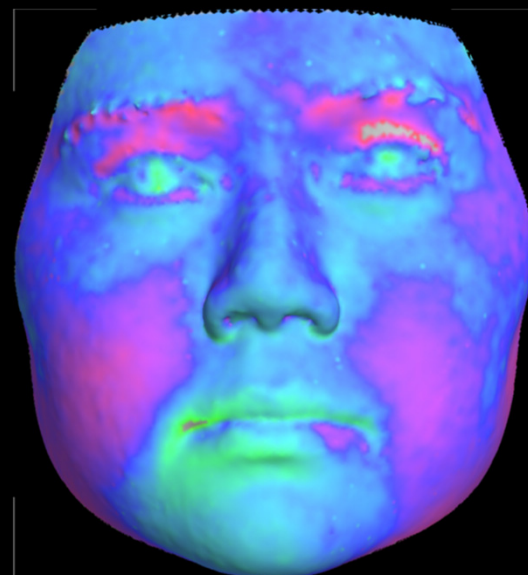

RMS=0.54

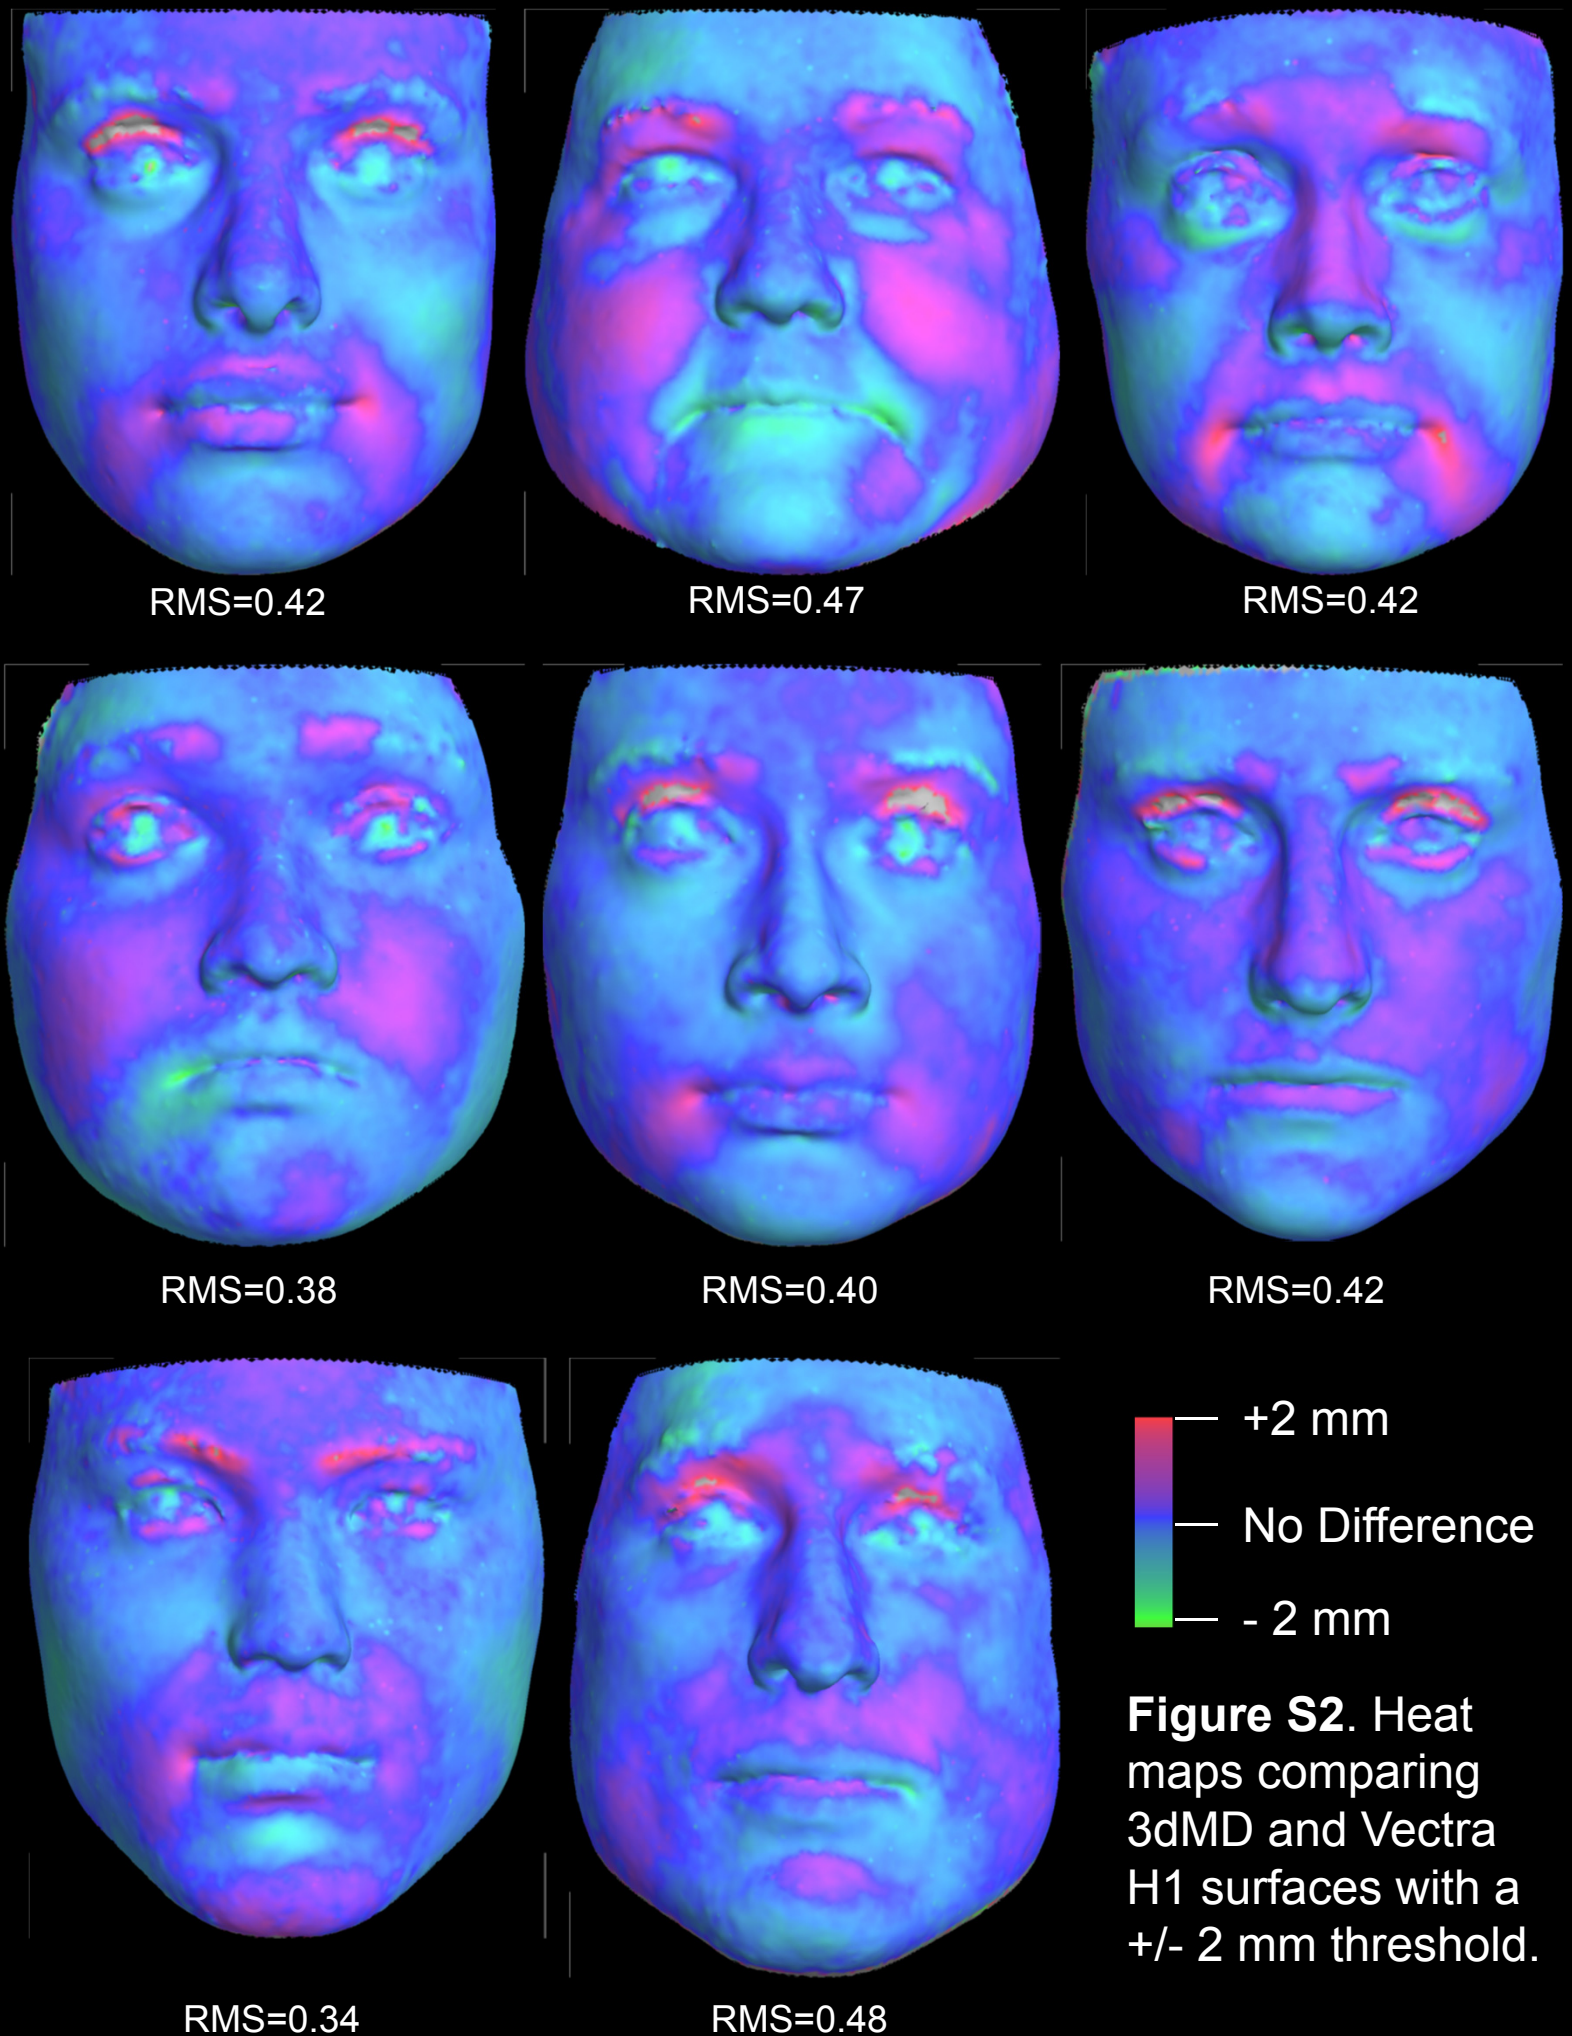

Supplement: NIHMS904667-supplement-2.pdf [file NIHMS904667-supplement-2.pdf]
